# Supplementary material
Source: publisher figshare collection journal article supplement (https://acs.figshare.com/ndownloader/files/5799846)

#### Terms & Conditions

Electronic Supporting Information files are available without a subscription to ACS Web Editions. The American Chemical Society holds a copyright ownership interest in any copyrightable Supporting Information. Files available from the ACS website may be downloaded for personal use only. Users are not otherwise permitted to reproduce, republish, redistribute, or sell any Supporting Information from the ACS website, either in whole or in part, in either machine-readable form or any other form without permission from the American Chemical Society. For permission to reproduce, republish and redistribute this material, requesters must process their own requests via the RightsLink permission system. Information about how to use the RightsLink permission system can be found at <http://pubs.acs.org/page/copyright/permissions.html>

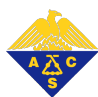

ACS Publications

MOST TRUSTED. MOST CITED. MOST READ.

Copyright © 1998 American Chemical Society

### Derivation of Kinetic Expression for Enantioselectivity. Monomeric 1.

For a reversible equilibrium between **1** and **3** as shown in Scheme 1, there will exist two different catalytic species, **1** and **1•3**, both of which catalyze the formation of product **3** with different rates and enantioselectivities. As it is known that there is no appreciable background rate for the reaction of aldehydes with HCN in toluene,<sup>1</sup> the rate of production of each cyanohydrin isomer can be written as:

$$\frac{d[\mathbf{3}_R]}{dt} = k_{1R} [\text{HCN}][\mathbf{2}][\mathbf{1}] + k_{13R} [\text{HCN}][\mathbf{2}][\mathbf{1}\cdot\mathbf{3}]$$

$$\frac{d[\mathbf{3}_S]}{dt} = k_{1S} [\text{HCN}][\mathbf{2}][\mathbf{1}] + k_{13S} [\text{HCN}][\mathbf{2}][\mathbf{1}\cdot\mathbf{3}]$$

where  $k_{1R}$ ,  $k_{13R}$ ,  $k_{1S}$  and  $k_{13S}$  are fundamental rate constants for the production of the two cyanohydrin isomers **3<sub>R</sub>** and **3<sub>S</sub>** as catalyzed by the two species **1** and **1•3**, respectively. Assuming a simple, two-state equilibrium between **1** and **1•3** with equilibrium constant  $K_A = [\mathbf{1}\cdot\mathbf{3}]/[\mathbf{1}][\mathbf{3}]$ , one can replace **1•3** with  $K_A[\mathbf{1}][\mathbf{3}]$  to give:

$$\frac{d[\mathbf{3}_R]}{dt} = [\text{HCN}][\mathbf{2}][\mathbf{1}](k_{1R} + k_{13R} K_A [\mathbf{3}])$$

$$\frac{d[\mathbf{3}_S]}{dt} = [\text{HCN}][\mathbf{2}][\mathbf{1}](k_{1S} + k_{13S} K_A [\mathbf{3}])$$

Using the relationships  $[\mathbf{1}] + [\mathbf{1}\cdot\mathbf{3}] = [\mathbf{1}]_{\text{tot}}$  and  $[\mathbf{1}\cdot\mathbf{3}] = K_A[\mathbf{1}][\mathbf{3}]$  allows one to make the substitution  $[\mathbf{1}] = \frac{[\mathbf{1}]_{\text{tot}}}{1 + K_A [\mathbf{3}]}$  and yield:

$$\frac{d[\mathbf{3}_R]}{dt} = \frac{[\text{HCN}][\mathbf{2}][\mathbf{1}]_{\text{tot}}(k_{1R} + k_{13R} K_A [\mathbf{3}])}{1 + K_A [\mathbf{3}]}$$

$$\frac{d[\mathbf{3}_S]}{dt} = \frac{[\text{HCN}][\mathbf{2}][\mathbf{1}]_{\text{tot}}(k_{1S} + k_{13S} K_A [\mathbf{3}])}{1 + K_A [\mathbf{3}]}$$

Using the definition of enantiomeric excess, one can construct an equation relating an "instantaneous" enantiomeric excess  $ee'(t)$  to the rates of production of each isomer as:

$$ee'(t) = \frac{\frac{d[\mathbf{3}_S]}{dt} - \frac{d[\mathbf{3}_R]}{dt}}{\frac{d[\mathbf{3}_S]}{dt} + \frac{d[\mathbf{3}_R]}{dt}} = \frac{(k_{1S} + k_{13S} K_A [\mathbf{3}]) - (k_{1R} + k_{13R} K_A [\mathbf{3}])}{(k_{1S} + k_{13S} K_A [\mathbf{3}]) + (k_{1R} + k_{13R} K_A [\mathbf{3}])}$$

To convert this time-dependent function to a function of degree of conversion, one must relate the time-dependent variable **[3]** to degree of conversion (X) using the definition  $X = [\mathbf{3}]/[\mathbf{2}]_0$ , where **[2]<sub>0</sub>** is the initial concentration of aldehyde **2**. Doing so gives the following equation:

$$ee'(X) = \frac{(k_{1S} - k_{1R}) + (k_{13S} - k_{13R})K_A [\mathbf{2}]_0 X}{(k_{1S} + k_{1R}) + (k_{13S} + k_{13R})K_A [\mathbf{2}]_0 X}$$

This equation is the familiar sigmoidal, binding isotherm relationship exhibited by any two-state equilibrium, where the instantaneous enantioselectivity is the variable responding to changes in concentration of cyanohydrin. To derive an expression for the enantiomeric excess of accumulated product, one must integrate the expression for "instantaneous" enantiomeric excess with respect to the variable X from X=0 to X= $\chi$ . Doing so affords the expression:

$$ee(\chi) = \frac{k_{13S} - k_{13R}}{k_{13R} + k_{13S}} \chi + \frac{(k_{1S} - k_{1R})(k_{13R} + k_{13S}) - (k_{1R} + k_{1S})(k_{13S} - k_{13R})}{(k_{13S} + k_{13R})^2 K_A [2]_0} \ln \left[ 1 + \frac{k_{13R} + k_{13S}}{k_{1R} + k_{1S}} [2]_0 K_A \chi \right]$$

This expression must be normalized for the degree of conversion by division by  $\chi$  to afford equation 2.

### Derivation of Kinetic Expression for Enantioselectivity. Dimeric 1.

If one assumes that the catalytic species in Scheme 1 are dimeric, the rate of production of cyanohydrin isomers will depend on  $[1]^2$  and  $[1 \bullet 3]^2$  and the expression for instantaneous enantioselectivity will be given as:

$$ee'(X) = \frac{(k_{1S} - k_{1R}) + (k_{13S} - k_{13R}) K_A^2 [2]_0^2 X^2}{(k_{1S} + k_{1R}) + (k_{13S} + k_{13R}) K_A^2 [2]_0^2 X^2}$$

Integrating this expression with respect to X from X=0 to X= $\chi$  affords the following relation:

$$ee(\chi) = \frac{k_{13S} - k_{13R}}{k_{13R} + k_{13S}} \chi + \frac{(k_{1S} - k_{1R})(k_{13R} + k_{13S}) - (k_{1R} + k_{1S})(k_{13S} - k_{13R})}{(k_{13S} + k_{13R})^2 \sqrt{(k_{1R} + k_{1S}) K_A [2]_0}} \tan^{-1} \left[ \sqrt{\frac{k_{13R} + k_{13S}}{k_{1S} + k_{1R}}} K_A [2]_0 \chi \right]$$

Normalizing this expression for the degree of completion affords equation 3.

### Solution for Kinetic Parameters $k_{1S}$ , $k_{1R}$ , $k_{13S}$ , $k_{13R}$ and $K_A$

The data shown in Fig. 1 were fit to equations 2-3 using the non-linear regression function of Microsoft Excel 5.0. From the fit, the four rate constants  $k_{1R}$ ,  $k_{1S}$ ,  $k_{13R}$  and  $k_{13S}$  were obtained. To obtain the equilibrium constant  $K_A$ , the sigmoidal equations for  $ee'(X)$  were solved for  $K_A$  using the rate constants previously obtained. The parameters obtained, along with the residual error from each fit, are given below:

| aldehyde | equation | $k_{1R}$ | $k_{1S}$ | $k_{13R}$ | $k_{13S}$ | $K_A$ | residual |
|----------|----------|----------|----------|-----------|-----------|-------|----------|
| 2a       | 2        | 1686.9   | 785.1    | 2476.4    | -0.0      | 9.91  | 0.02614  |
| 2a       | 3        | 5.19E6   | 2.58E6   | 3.53E6    | -0.0      | 5.80  | 0.01380  |
| 2b       | 2        | 57.4     | 57.4     | 115.0     | -0.0      | 9.69  | 0.02760  |
| 2b       | 3        | 8.82E7   | 3.54E7   | 5.79E8    | 3.54      | 7.19  | 0.01523  |
| 2c       | 2        | 106.2    | 58.0     | 1057.0    | -0.0      | 2.91  | 0.01979  |
| 2c       | 3        | 2.19E6   | 5.44E5   | 2.30E7    | 1.93E5    | 1.94  | 0.02136  |
| 2d       | 2        | 11.0     | 7.72     | 18.7      | -0.0      | 2.22  | 0.00649  |
| 2d       | 3        | 1.64E5   | 9.16E4   | 2.55E5    | -0.0      | 1.84  | 0.00503  |
| 2e       | 2        | 208.2    | 191.8    | 134.8     | 87.7      | 27.47 | 0.00136  |
| 2e       | 3        | 1.08E6   | 8.33E5   | 1.91E6    | 0.02      | 7.19  | 0.00136  |

From these parameters, the values of  $ee_1$ ,  $ee_{13}$  and  $k_{rel}$  were derived

# Benzaldehyde

## Instantaneous % ee vs. % Conversion

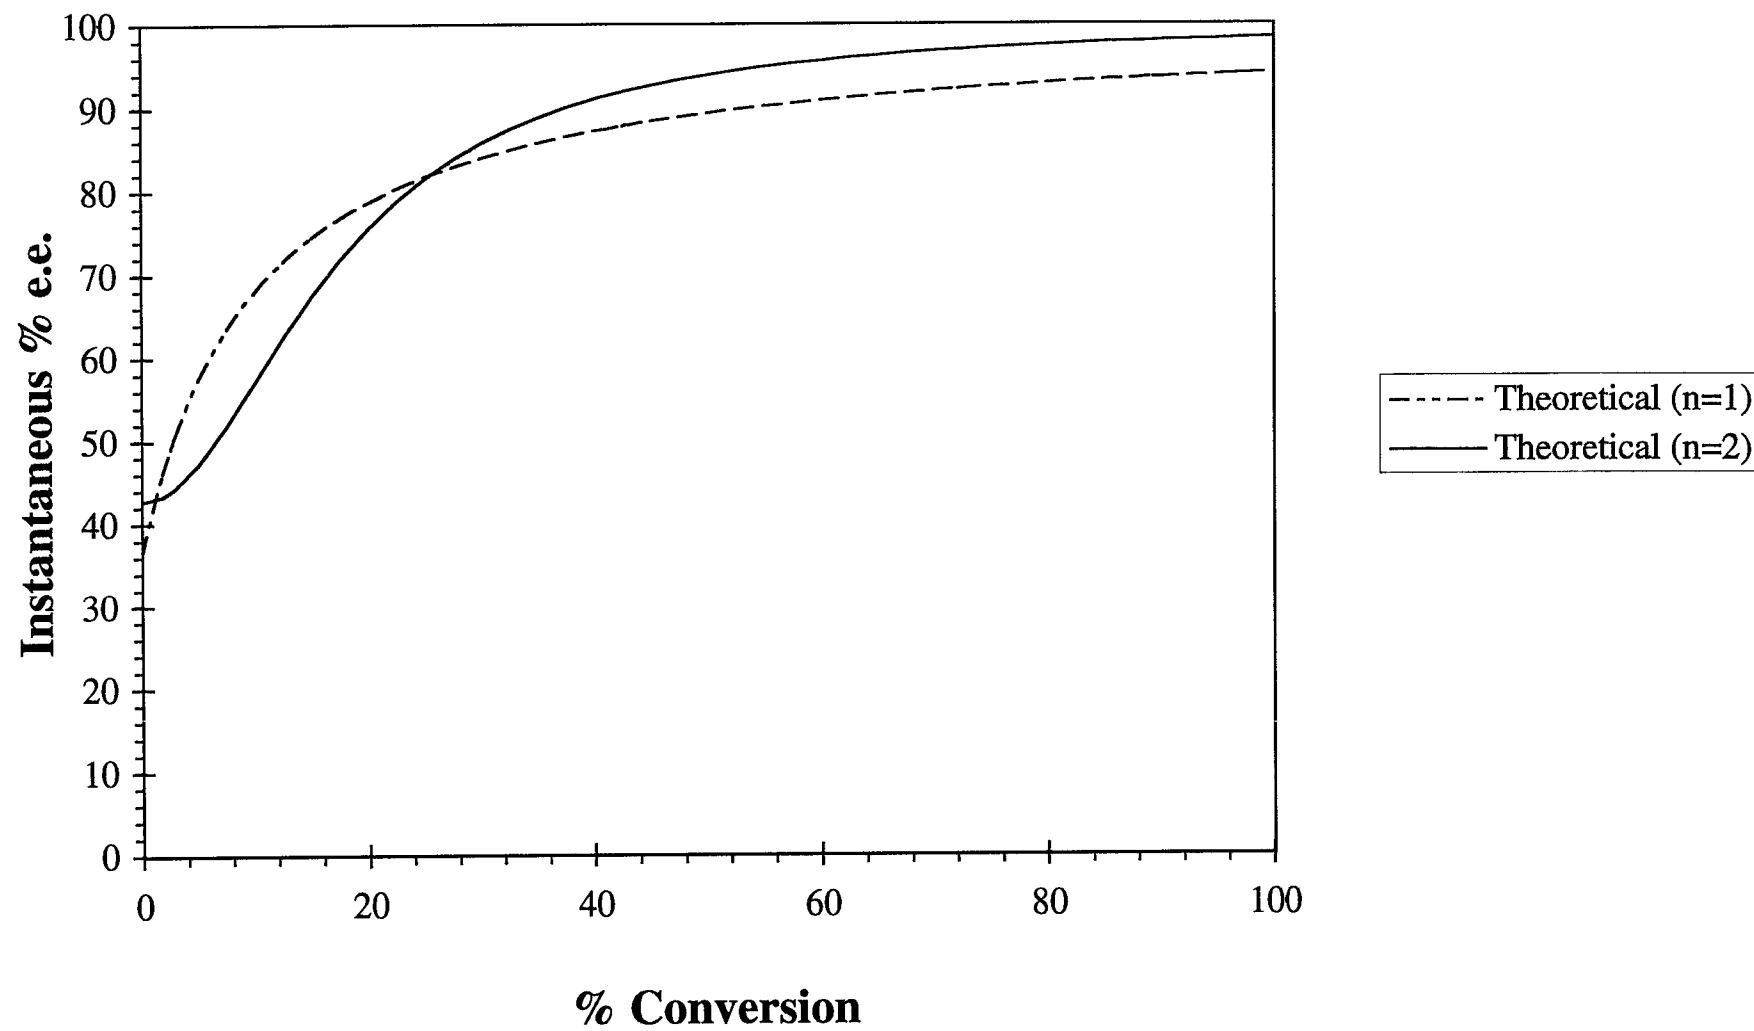

***m* -Phenoxybenzaldehyde**  
**Instantaneous % ee vs. % Conversion**

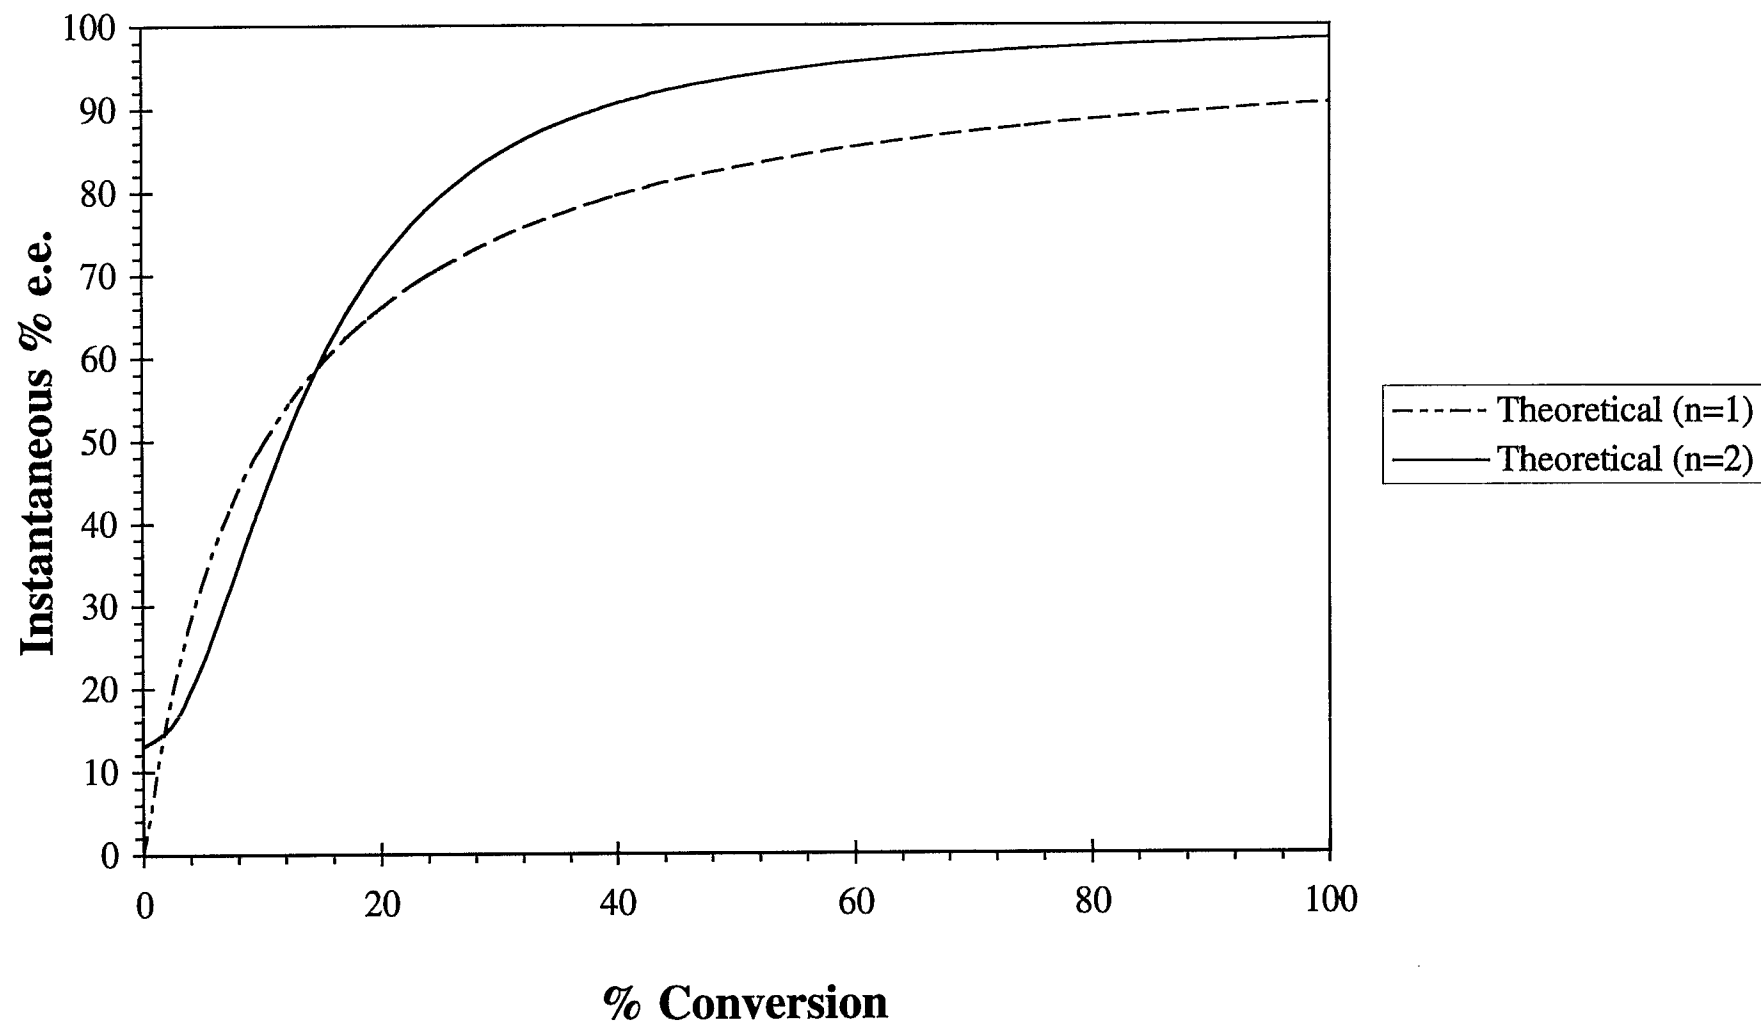

# Naphthaldehyde

## Instantaneous % ee vs. % Conversion

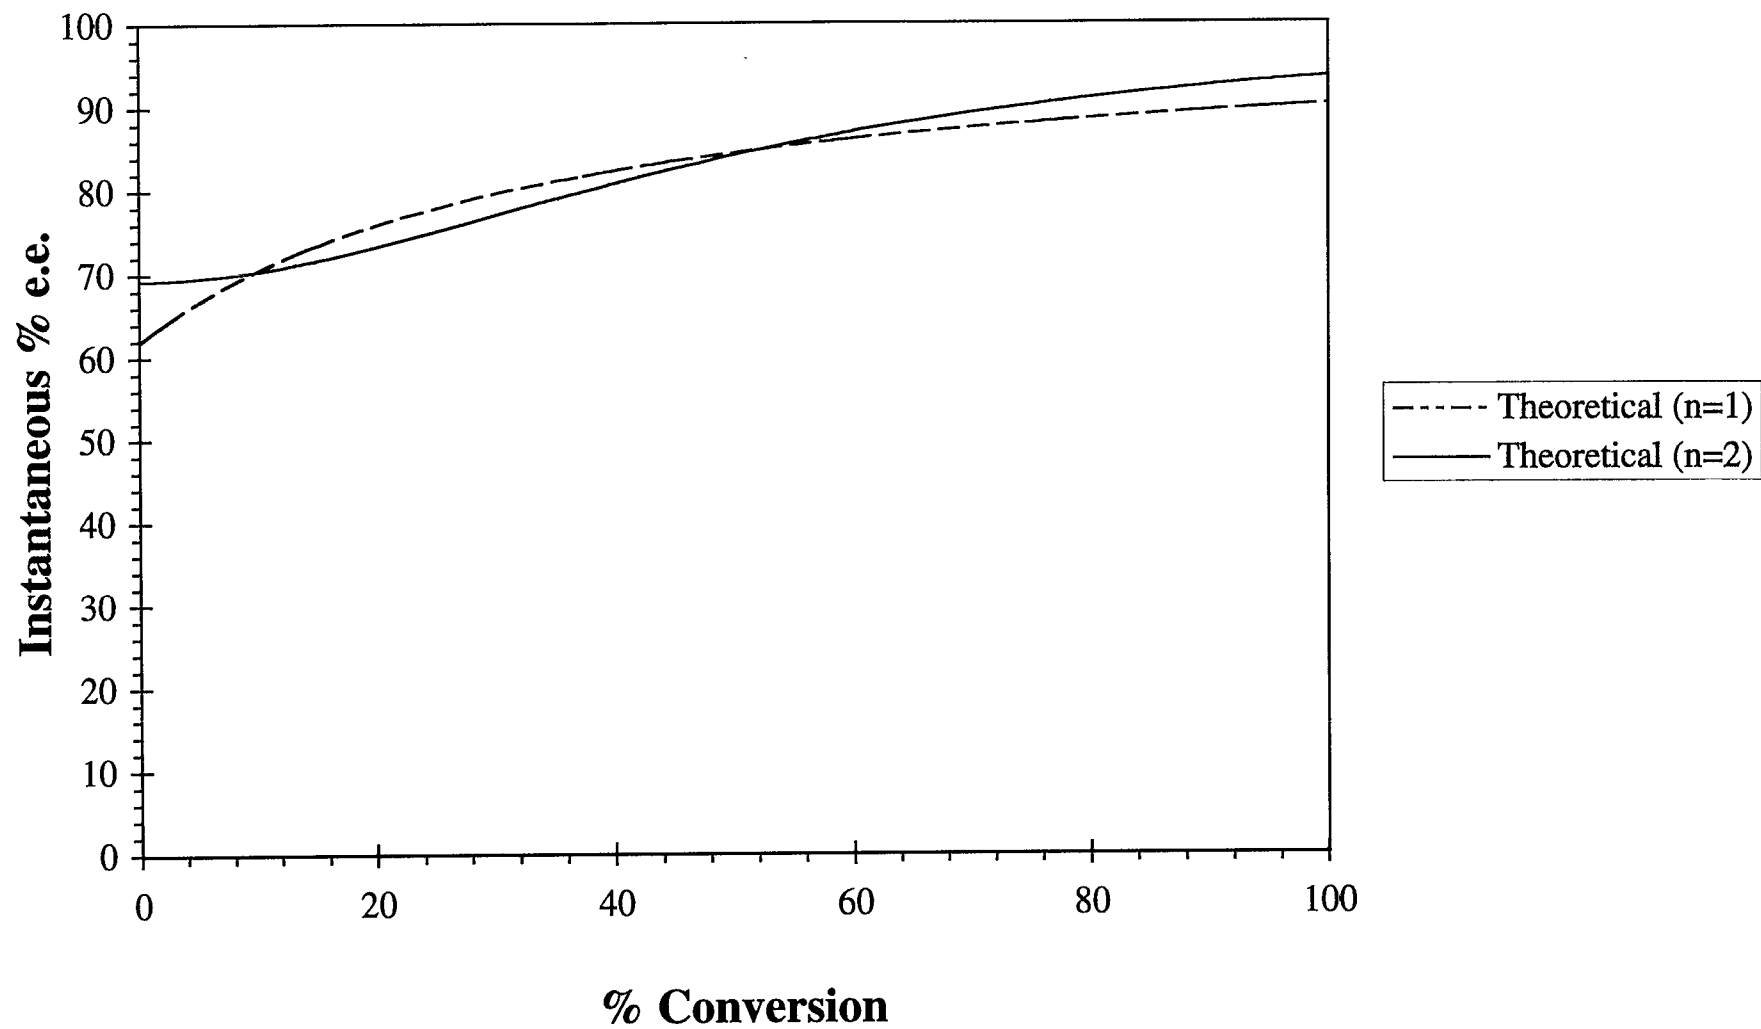

# Furfural

## Instantaneous % ee vs. % Conversion

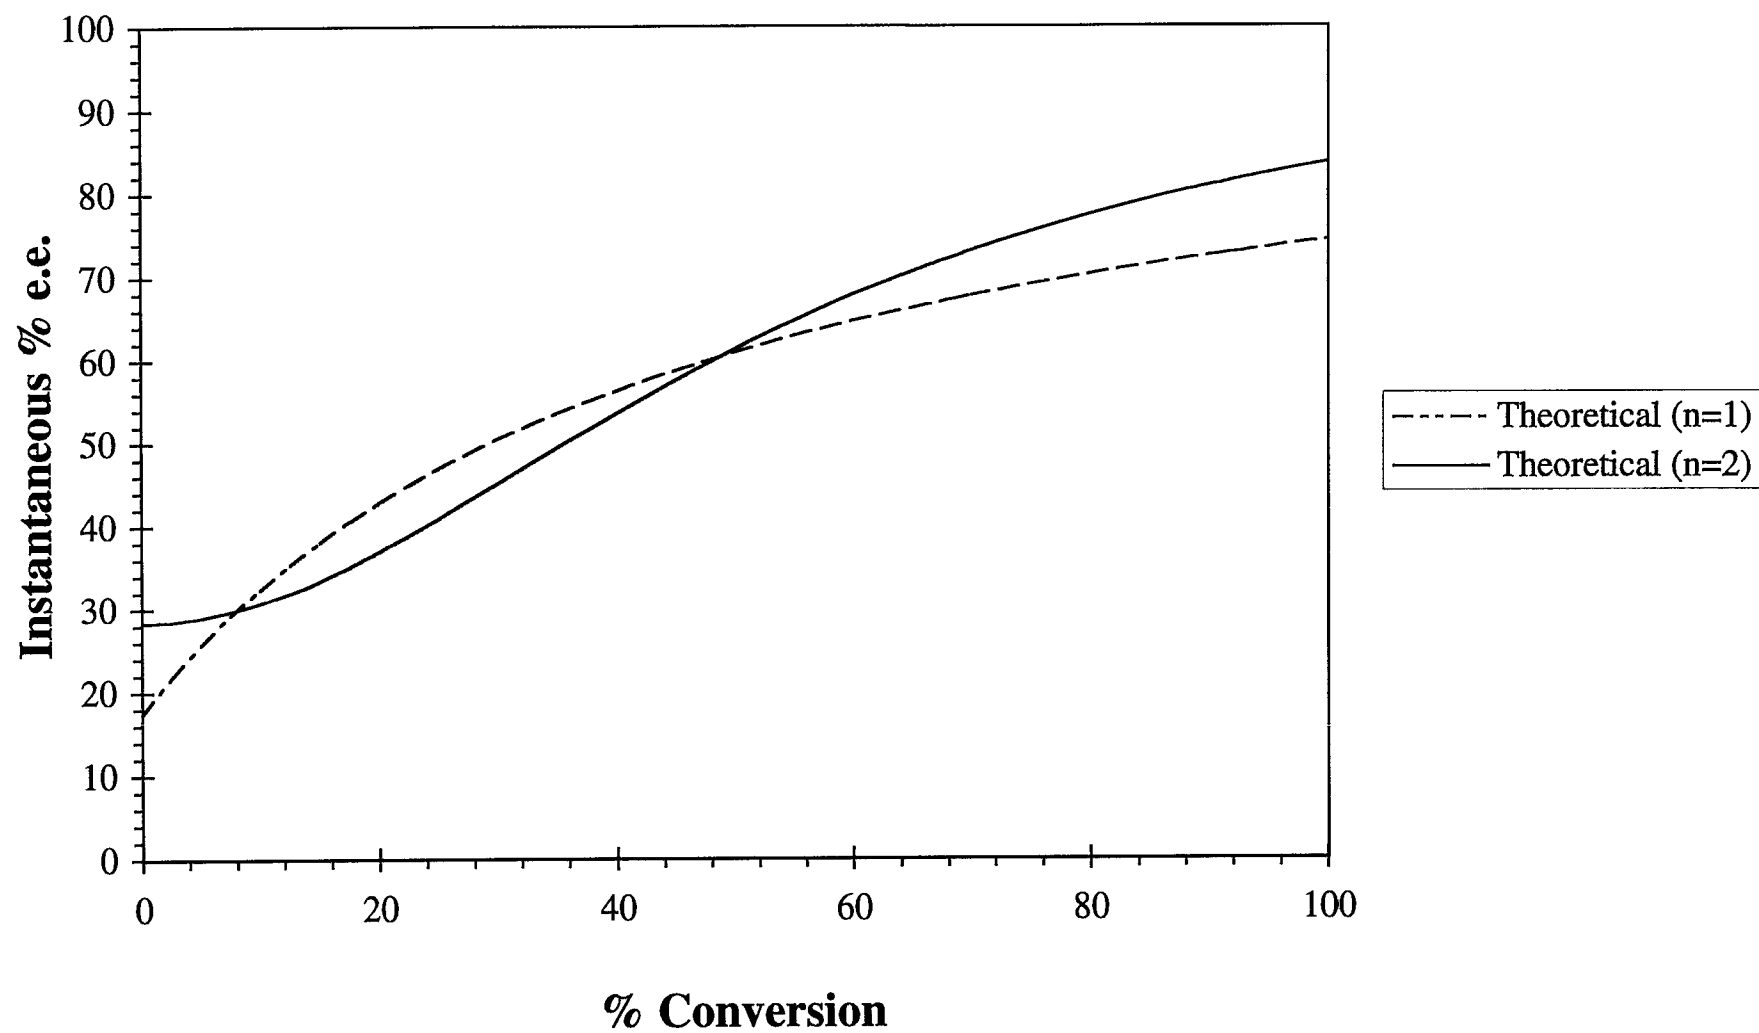

# Pivaldehyde

## Instantaneous % ee vs. % Conversion

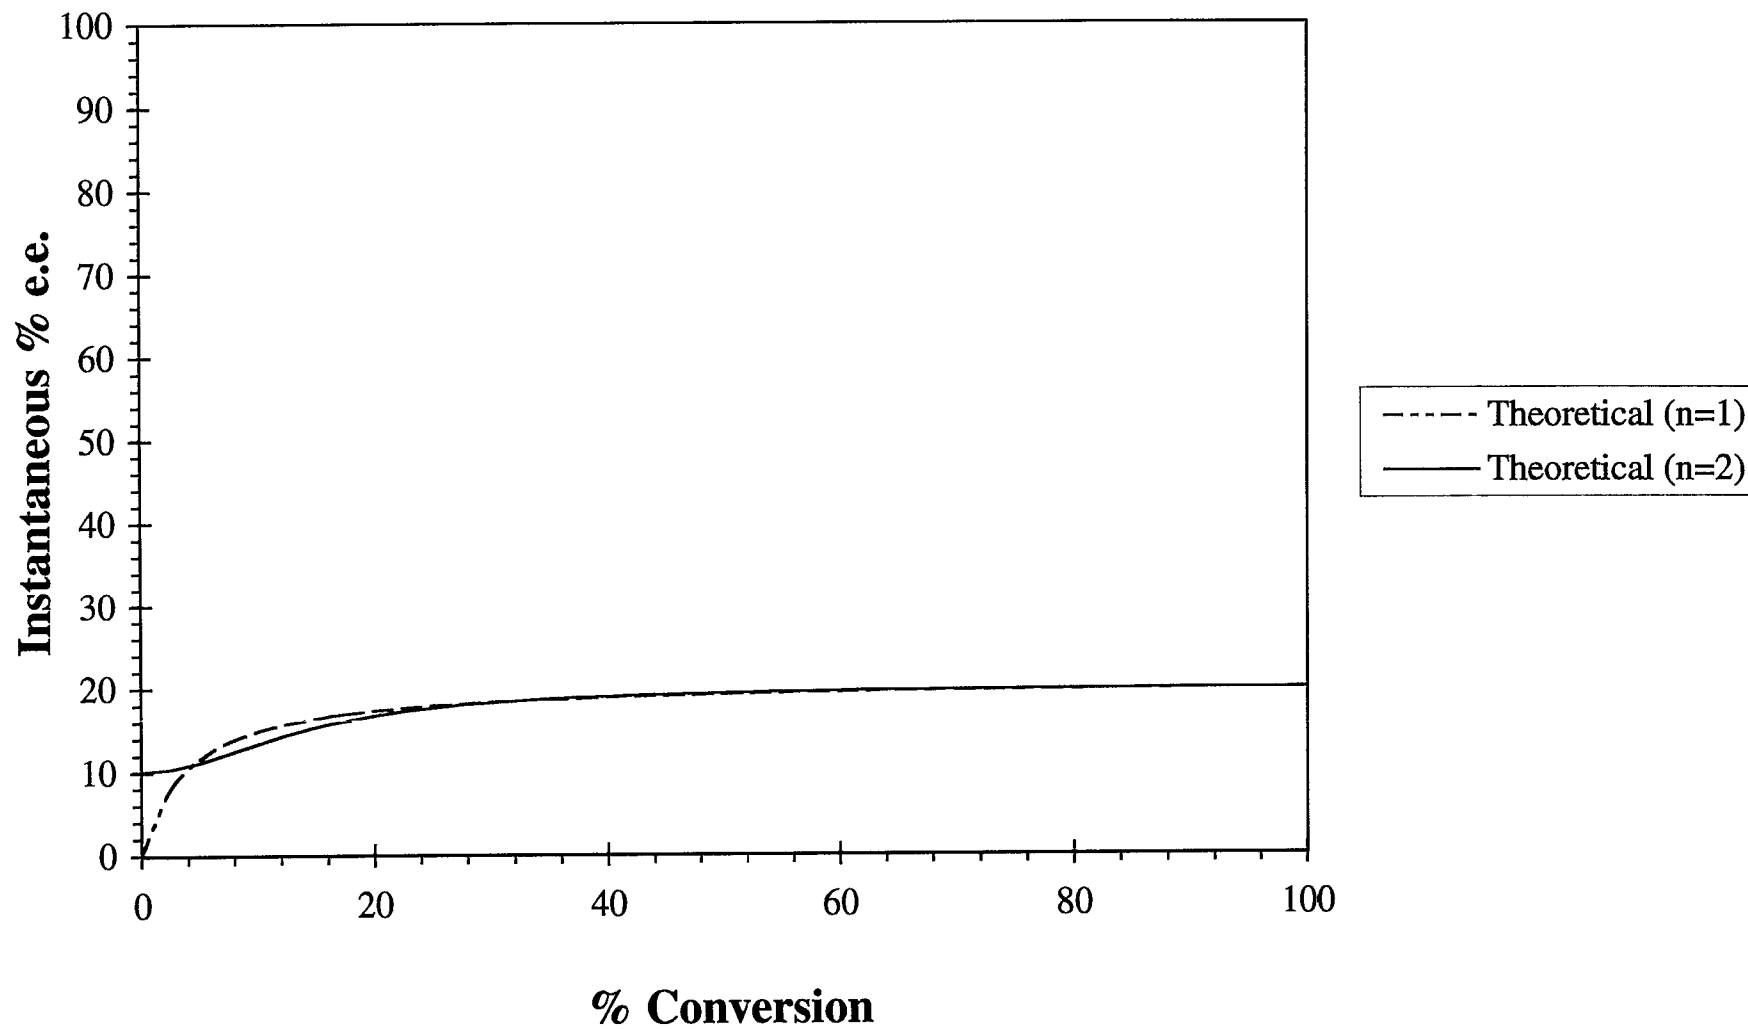

Supplement: Supplementary file 1 [file 5799846]
